# Supplementary material for: Hollow N-doped carbon nano-mushroom encapsulated hybrid Ni3S2/Fe5Ni4S8 particle anchored to the inner wall of porous wood carbon for efficient oxygen evolution electrocatalysis
Source: Royal Society of Chemistry journal article supplement (doi:10.1039/d3nr03676f), 2023-01-01
Supplement: d3nr03676f1.pdf [file d3nr03676f1.pdf]

**Supporting Information**

**Hollow N-doped carbon nano-mushroom encapsulated hybrid Ni<sub>3</sub>S<sub>2</sub>/Fe<sub>5</sub>Ni<sub>4</sub>S<sub>8</sub> particle anchored to the inner wall of porous wood carbon for efficient oxygen evolution electrocatalysis**

Ying Wang,<sup>1†</sup> Yuntang Zhuang,<sup>1†</sup> Yaru Hu,<sup>1</sup> Fangong Kong,<sup>1</sup> Guihua Yang,<sup>1</sup> Orlando J. Rojas,<sup>2</sup>

Ming He<sup>1,\*</sup>

<sup>1</sup>State Key Laboratory of Biobased Material and Green Papermaking, Qilu University of Technology (Shandong Academy of Sciences), Jinan, Shandong Province, 250353, P. R. China

<sup>2</sup>Bioproducts Institute, Department of Chemical & Biological Engineering, Department of Chemistry and Department of Wood Science, 2360 East Mall, The University of British Columbia, Vancouver, BC V6T 1Z3, Canada

\*Corresponding author: [heming8916@qlu.edu.cn](mailto:heming8916@qlu.edu.cn) (M. He)

†These authors contributed equally to this work.

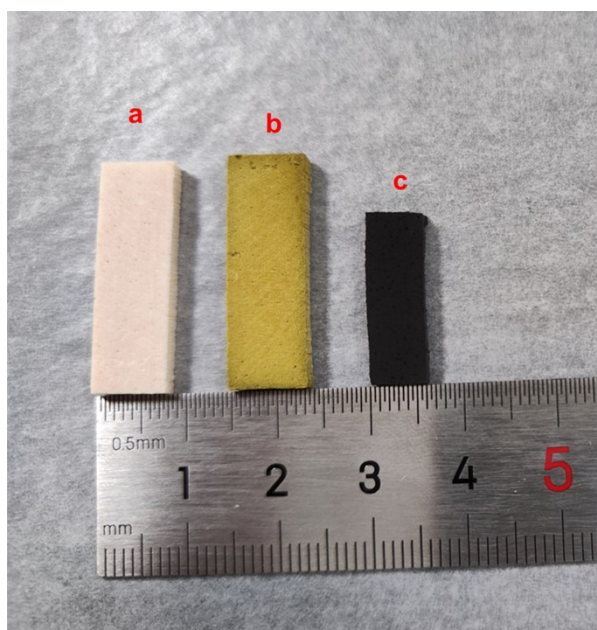

**Figure S1.** The digital photo of (a) natural balsa wood, (b) impregnated wood, and (c) NiFeS14@NCNM/CW.

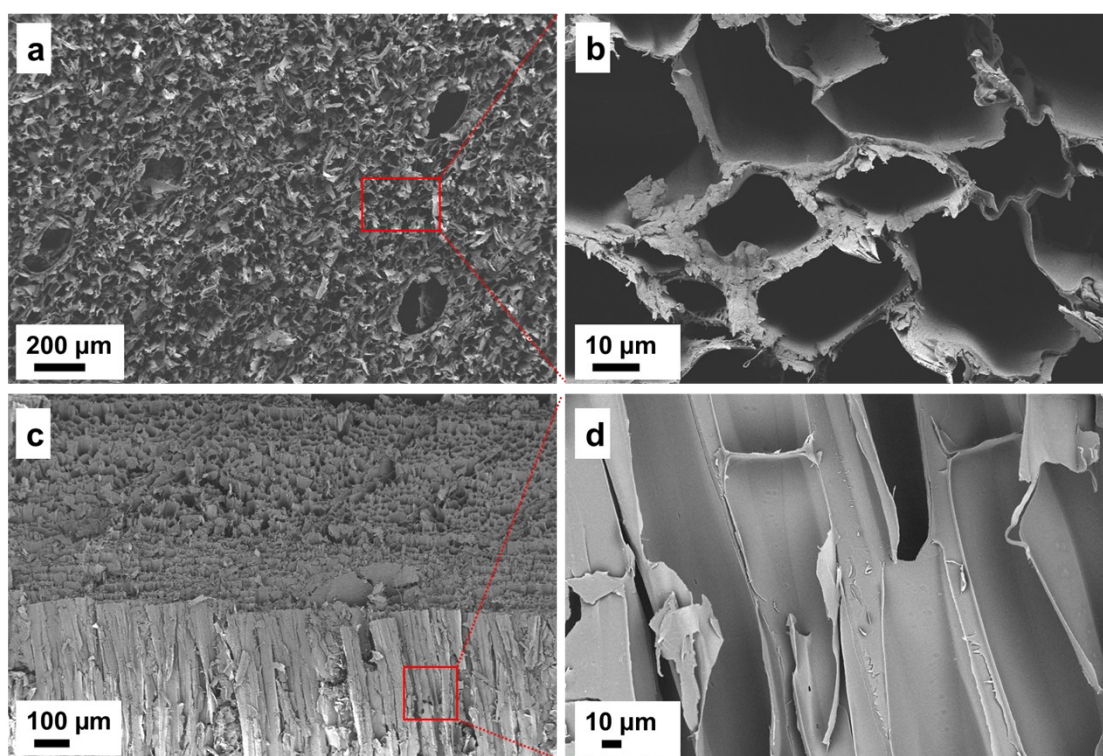

**Figure S2.** SEM images on the (a, b) cross-section and (c, d) tangential-section view for balsa wood, respectively.

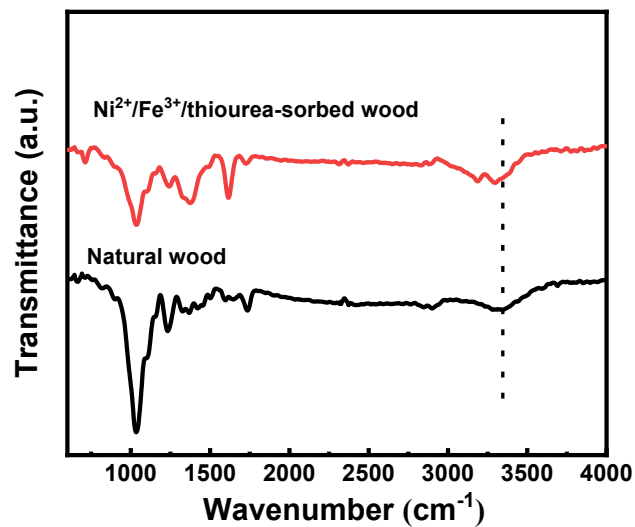

**Figure S3.** FTIR spectra of natural wood and  $\text{Ni}^{2+}/\text{Fe}^{3+}/\text{thiourea}$ -sorbed wood, respectively.

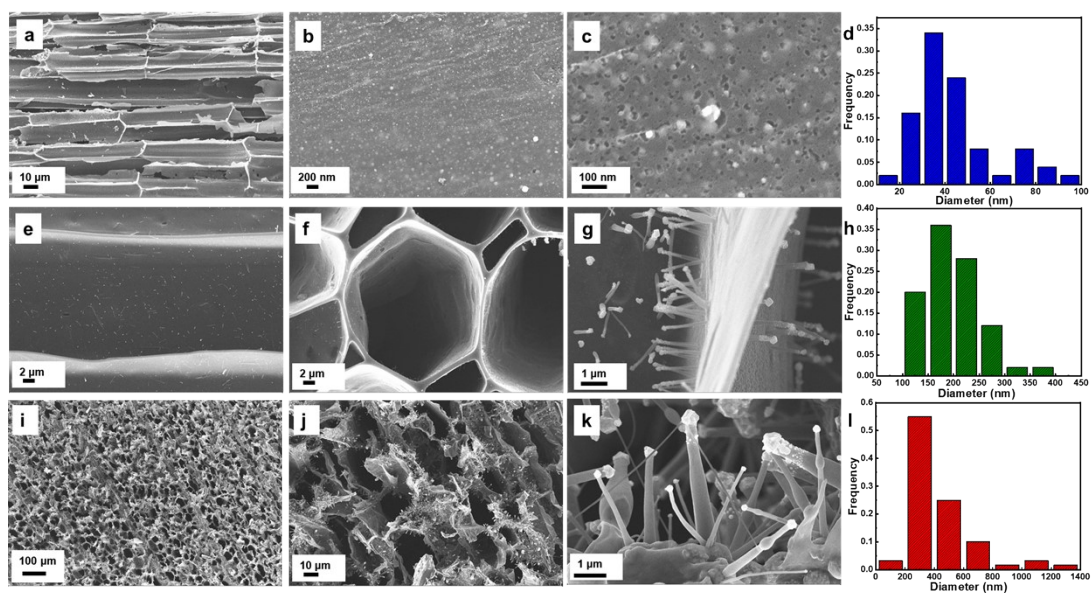

**Figure S4.** SEM images of the (a-c)  $\text{NiFe}/\text{CW}$ , (e-g)  $\text{NiFeS}_8@\text{NCNM}/\text{CW}$ , and (i-k)  $\text{NiFeS}_{14}@\text{NCNM}/\text{CW}$ . The columnar plots show the diameter distribution of the nanoparticles for (d)  $\text{NiFe}/\text{CW}$ , and nano-mushrooms for (h)  $\text{NiFeS}_8@\text{NCNM}/\text{CW}$  and (l)  $\text{NiFeS}_{14}@\text{NCNM}/\text{CW}$ .

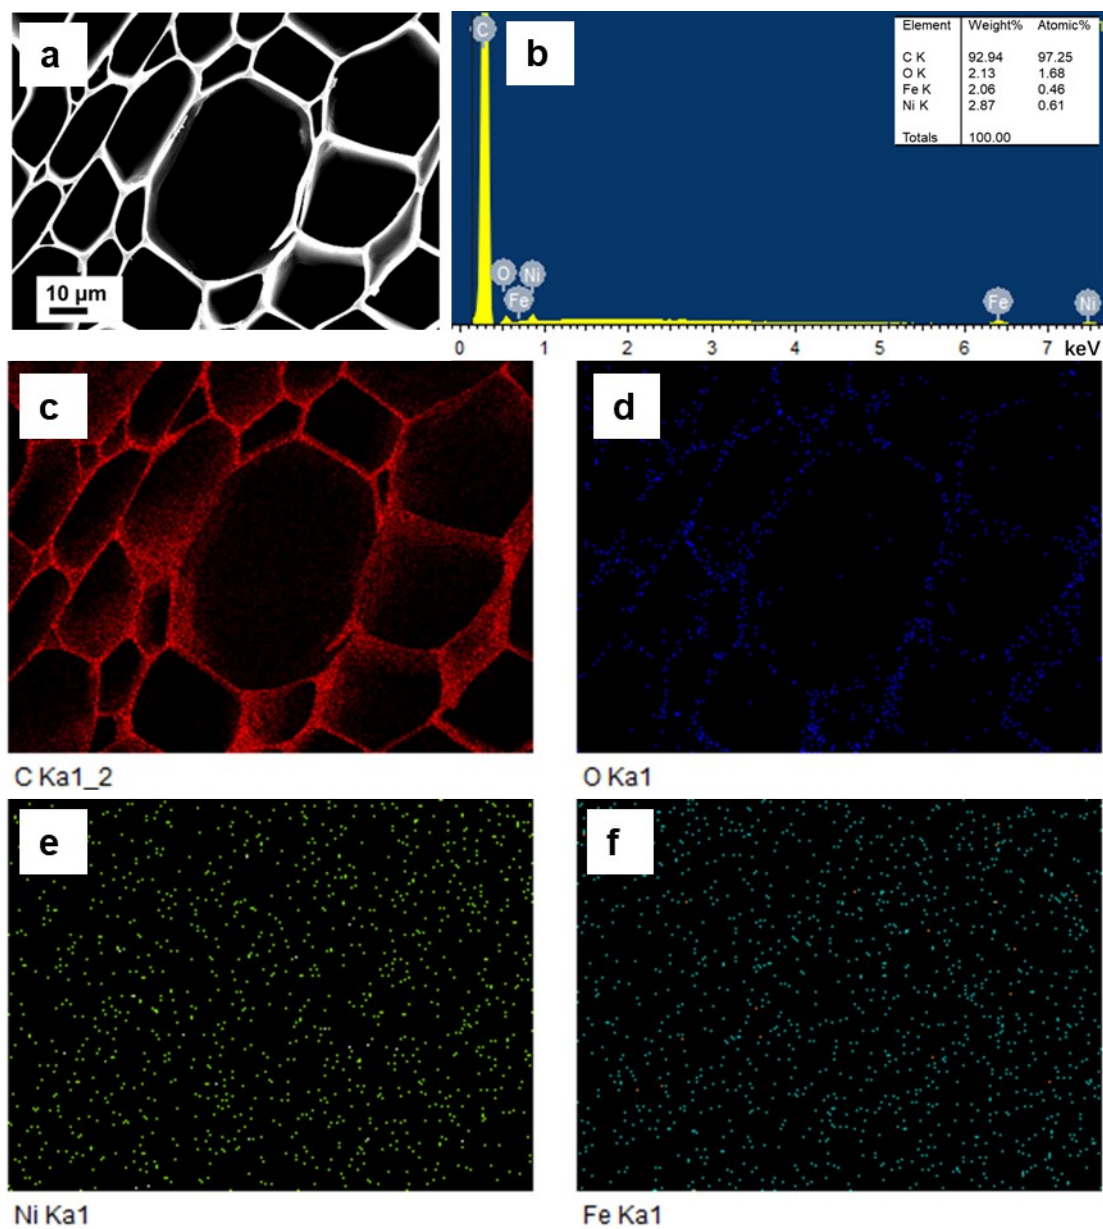

**Figure S5.** (a) Representative SEM image, (b) the corresponding EDX spectrum, and (c-f) element mapping of NiFe/CW.



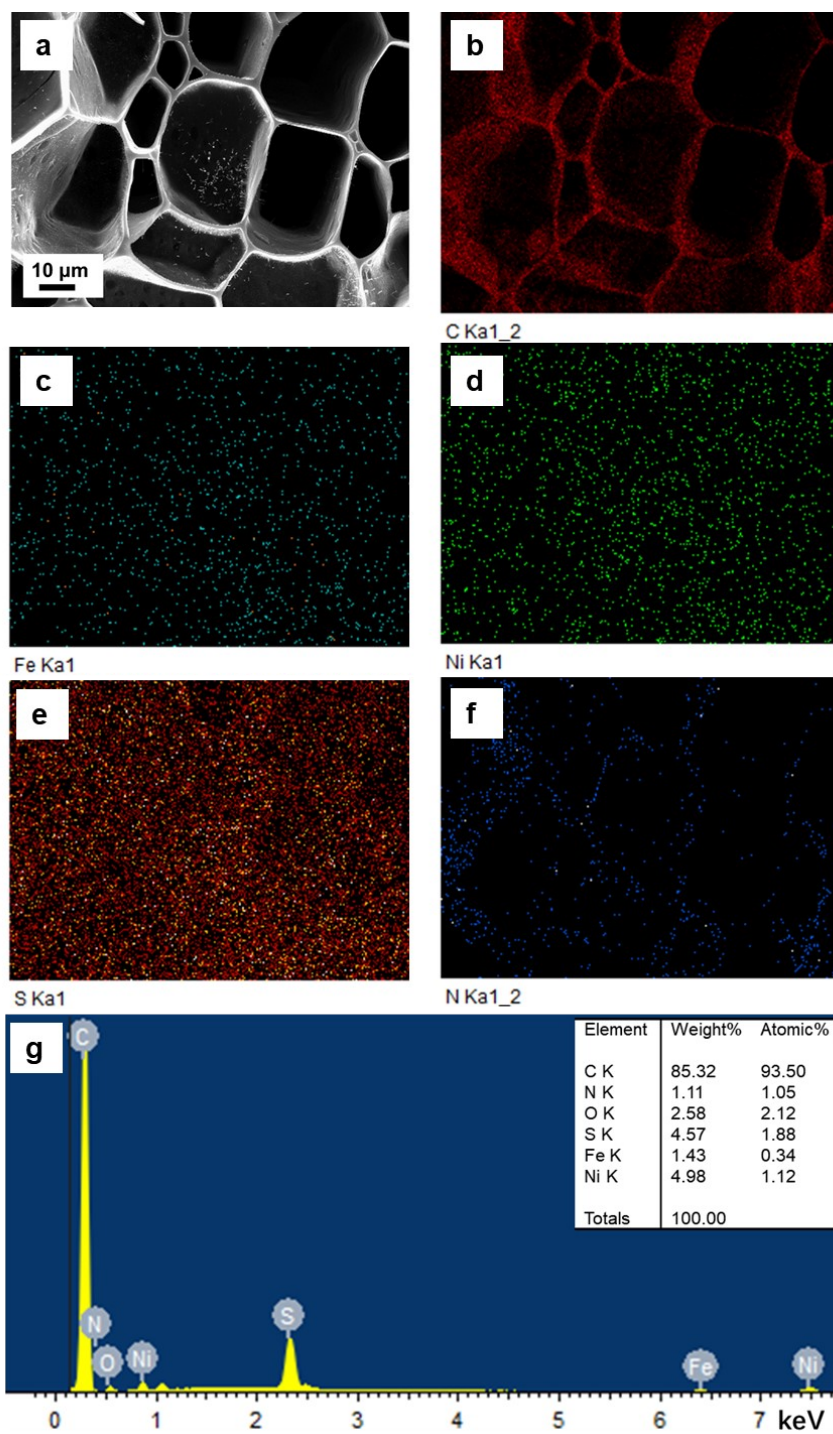

**Figure S6.** (a) Representative SEM image, (b-f) element mapping, and (g) the corresponding EDX spectrum of NiFeS8@NCNM/CW.

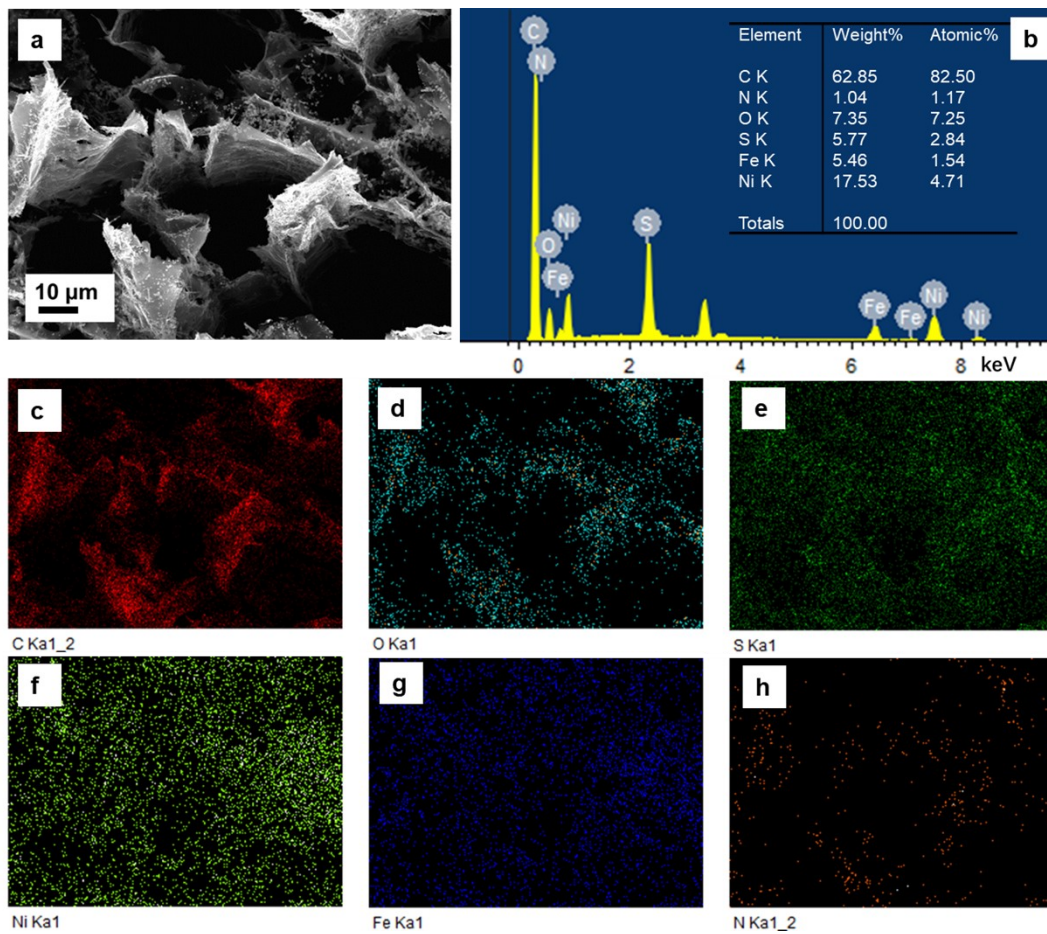

**Figure S7.** (a) Representative SEM image, (b) the corresponding EDX spectrum, and (c-h) element mapping of NiFeS<sub>14</sub>@NCNM/CW.

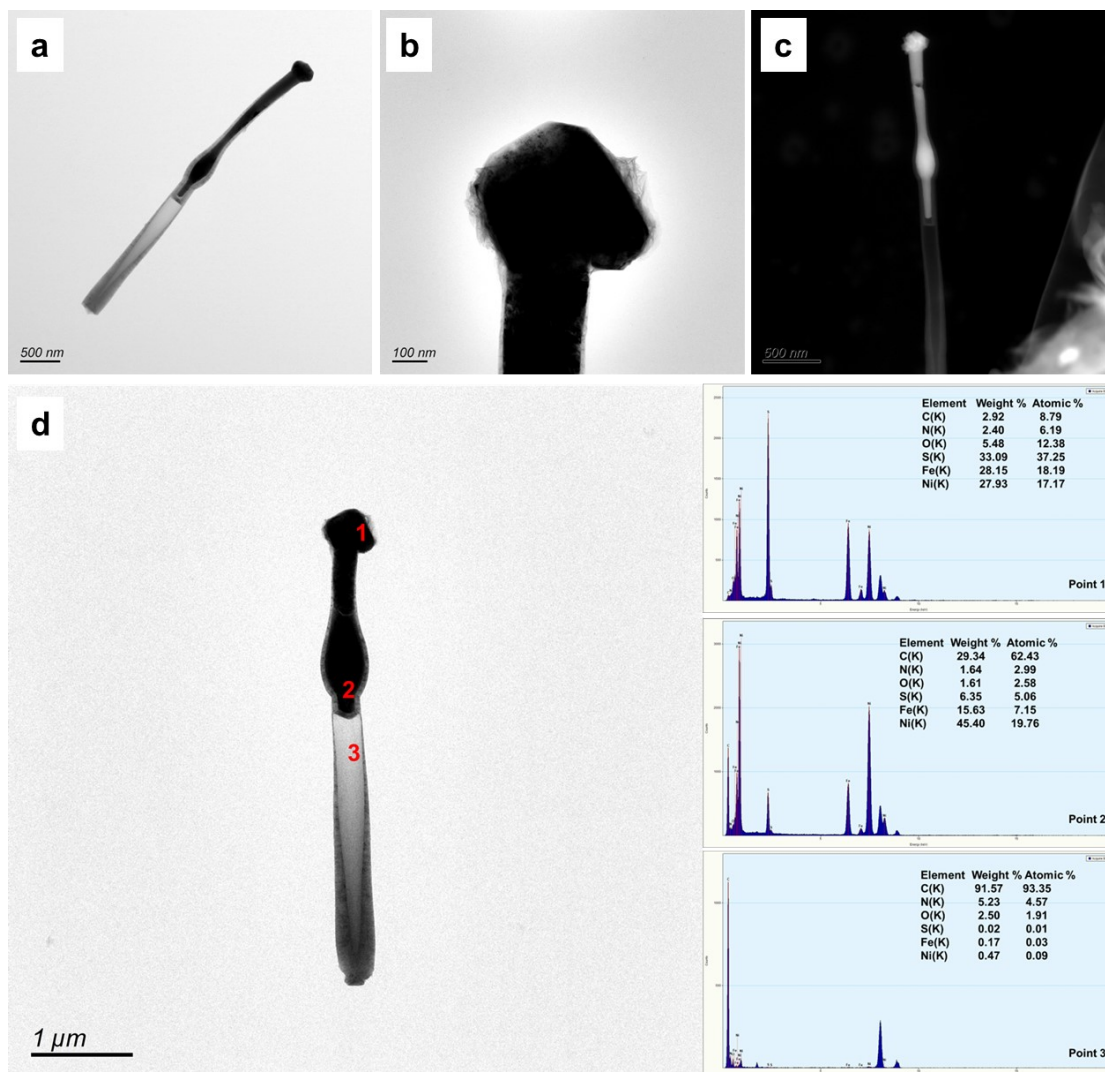

**Figure S8.** (a, b) TEM, (c) HAADF-STEM images, and (d) EDX spectra corresponding to different points of NiFeS<sub>14</sub>@NCNM/CW.

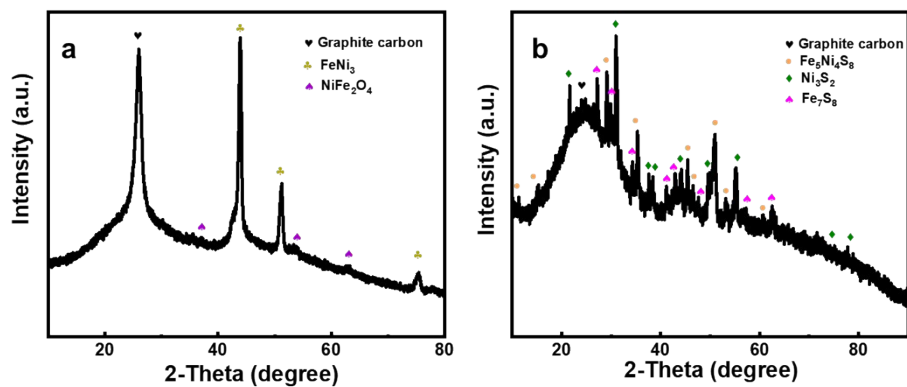

**Figure S9.** XRD patterns of the (a) NiFe/CW and (b) NiFeS8@NCNM/CW.

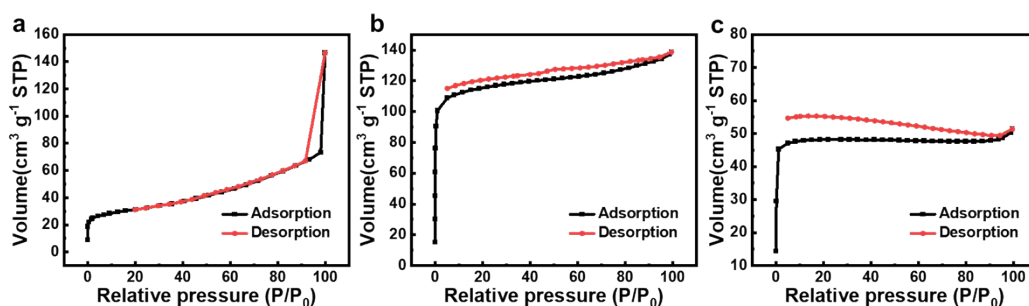

**Figure S10.** Nitrogen adsorption-desorption isotherms of (a) NiFeS8@NCNM/CW, (b) NiFe/CW, and (c) CW.

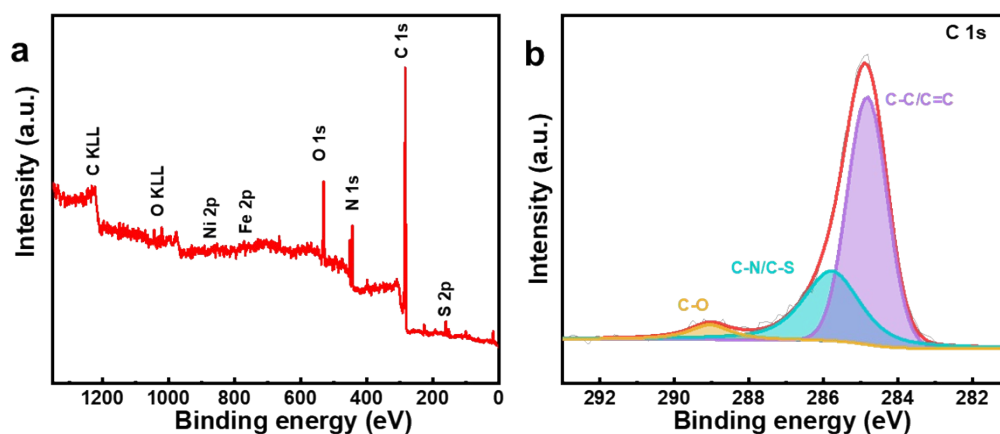

**Figure S11.** (a) Full XPS spectrum and (b) C 1s high-resolution spectrum of NiFeS14@NCNM/CW.



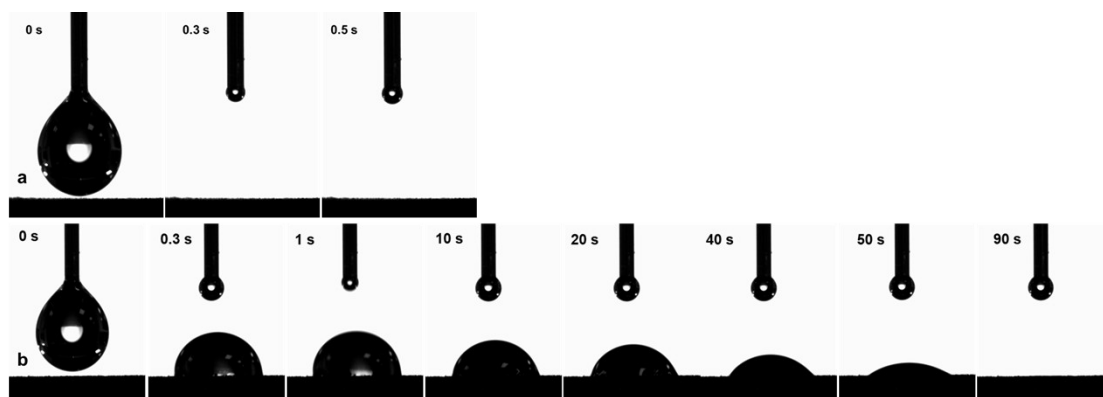

**Figure S12.** Static-water-droplet contact angles for (a) NiFeS14@NCNM/CW and (b) CW.

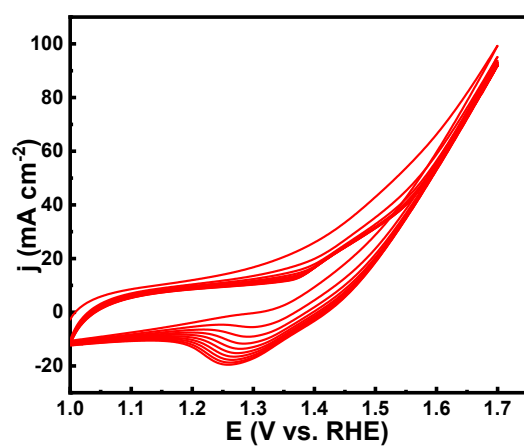

**Figure S13.** The whole activation CV curves of NiFeS14@NCNM/CW with the scan rate of  $50 \text{ mV s}^{-1}$ .

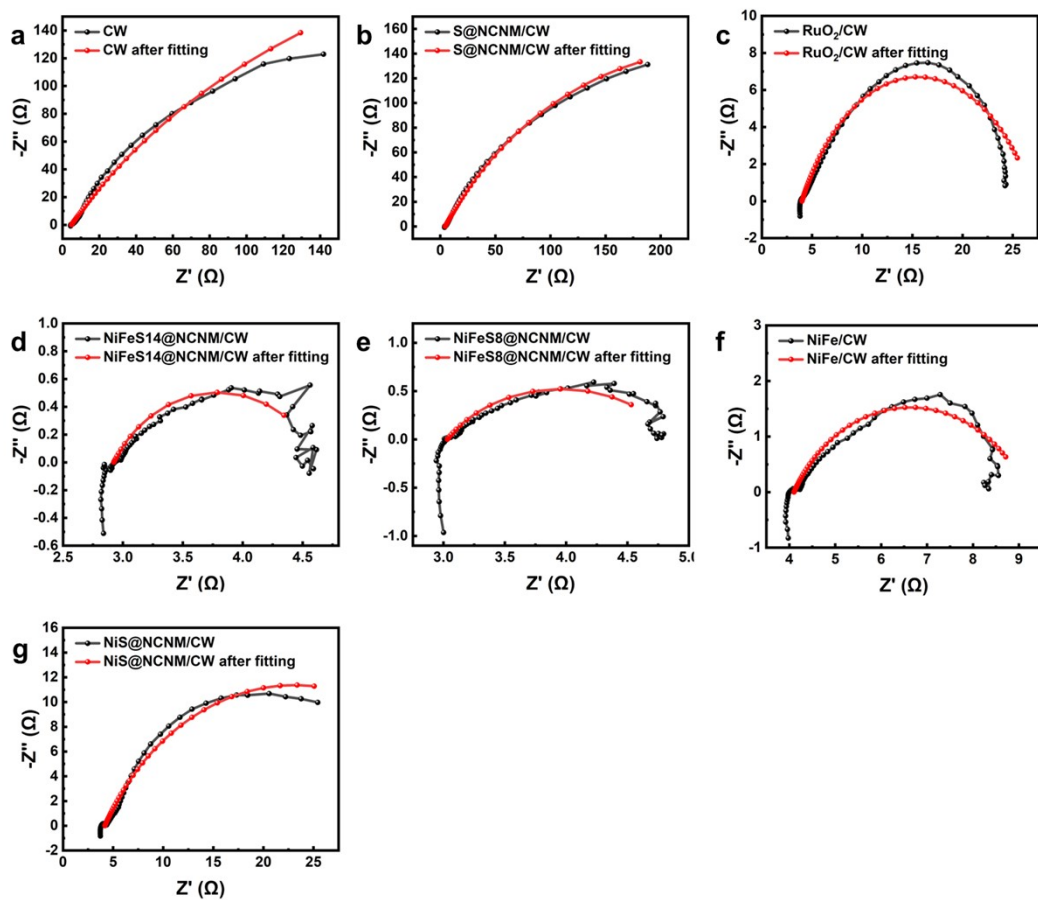

**Figure S14.** The original and the as-fitted Nyquist plots of different catalysts.

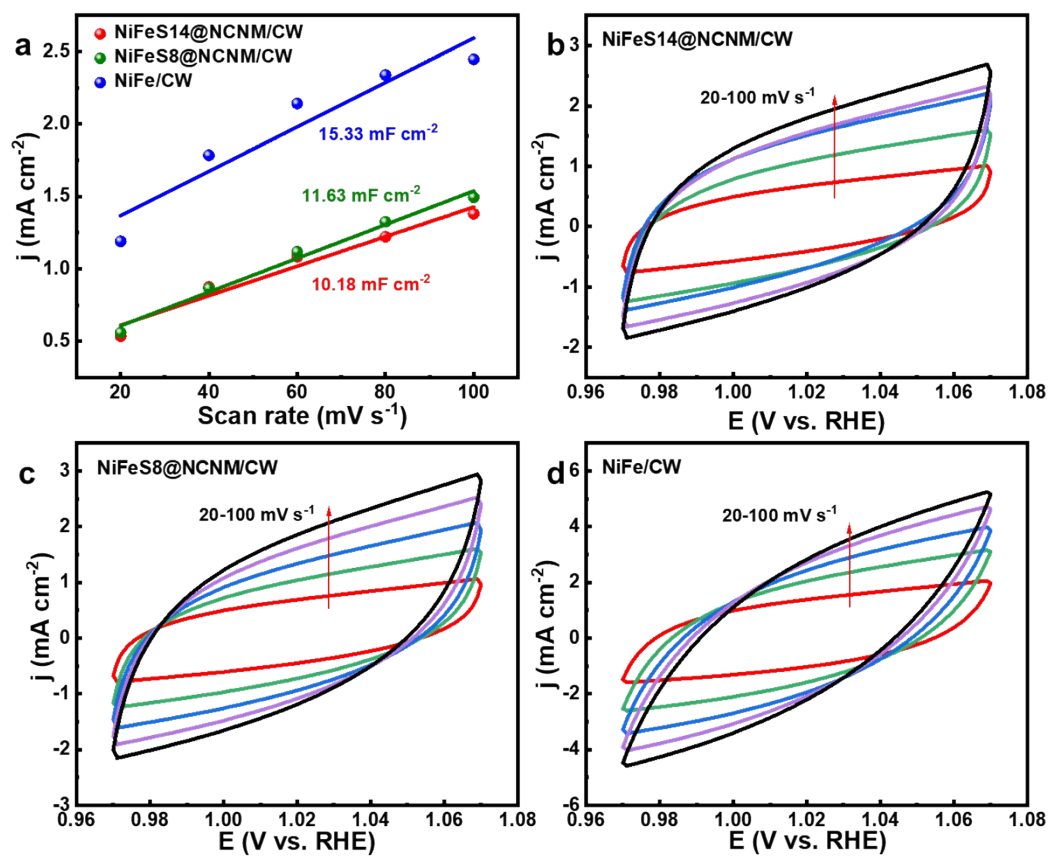

**Figure S15.** (a) The capacitive currents at 1.02 V vs. RHE as a function of scan rate for different catalysts. CV profiles of (b) NiFeS14@NCNM/CW, (c) NiFeS8@NCNM/CW, and (d) NiFe/CW with different scan rates of 20, 40, 60, 80, 100 mV s<sup>-1</sup>.

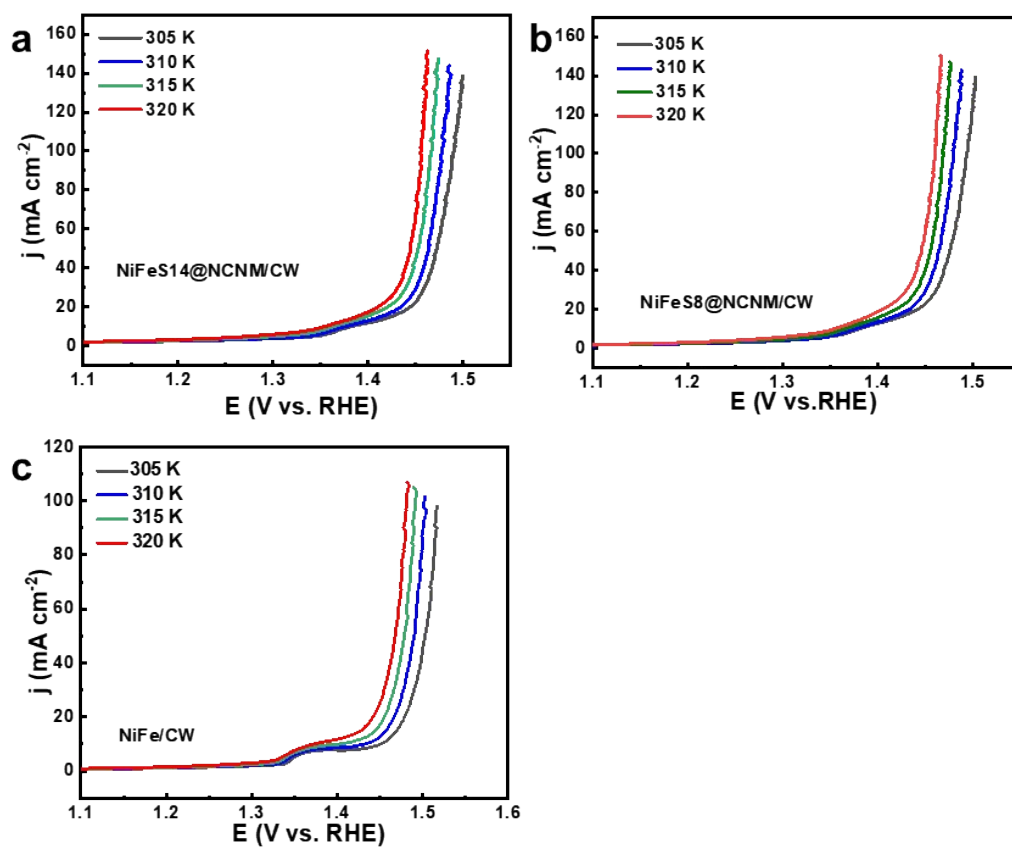

**Figure S16.** OER polarization curves of the (a) NiFeS14@NCNM/CW, (b) NiFeS8@NCNM/CW, and (c) NiFe/CW in 1 M KOH at different temperatures.



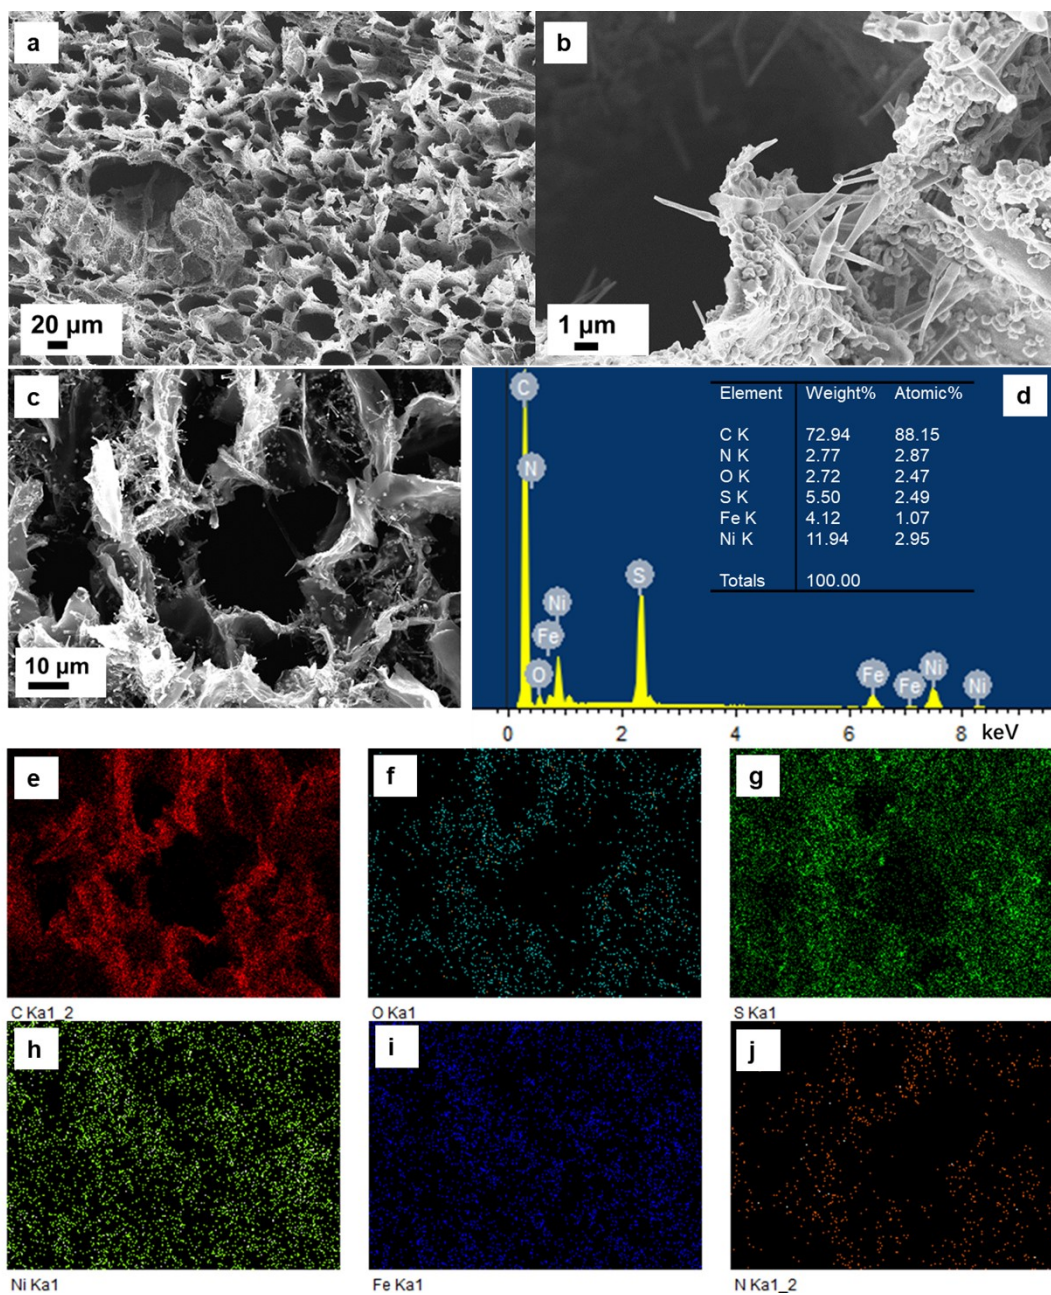

**Figure S17.** (a-c) Representative SEM images, (d) the corresponding EDX spectrum, and (e-j) EDX mapping of NiFeS14@NCNM/CW after durability test.

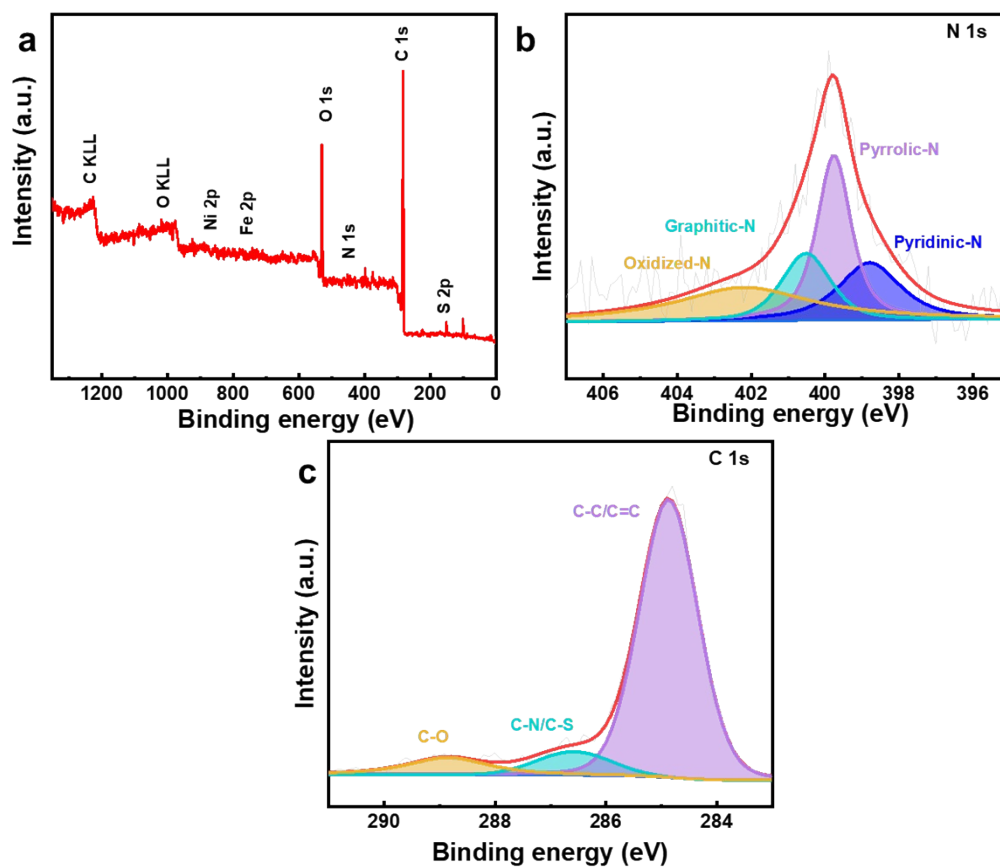

**Figure S18.** (a) Full XPS spectrum, (b) N 1s, and (b) C 1s high-resolution XPS spectra of NiFeS14@NCNM/CW after the OER durability test.

**Table S1.** Comparisons of OER activities of NiFeS<sub>14</sub>@NCNT/CW with those of recently reported biomass-derived carbon-supported electrocatalysts.

| Catalyst                               | Carbon source   | $\eta_{10}$ (mV)    | Tafel (mV dec <sup>-1</sup> ) | Stability(i-t)                  | Refs.     |
|----------------------------------------|-----------------|---------------------|-------------------------------|---------------------------------|-----------|
| NiFeS <sub>14</sub> @NCNM/CW           | balsa wood      | 147@10              | 56.3                          | retain 93% after 24 h           | This work |
|                                        |                 | 250@50              |                               |                                 |           |
|                                        |                 | mA cm <sup>-2</sup> |                               |                                 |           |
|                                        |                 | mA cm <sup>-2</sup> |                               |                                 |           |
| Co/Ni-CW                               | basswood        | 330                 | 68                            | retain 92% after 10 h           | 1         |
| Co@N-HPMC                              | basswood        | 297                 | 115.7                         | retain 64% after 3 h            | 2         |
| Ni-W-B/wood                            | fir wood        | 360@50              | 86.3                          | retain 90.4% after 50 h         | 3         |
| Co@NCW                                 | paulownia wood  | 350                 | 92                            | stable after 10 h               | 4         |
| CoFe@NC/WC                             | spruce wood     | 315                 | 57.6                          | stable after 24 h               | 5         |
| NiFe/DWC                               | poplar wood     | 260@100             | 98                            | potential retain 97% after 60 h | 6         |
| Co@NCW                                 | basswood        | 410                 | -                             | -                               | 7         |
| Ni <sub>3</sub> Fe-CW                  | basswood        | 237                 | 138                           | retain 94.6% after 50 h         | 8         |
| FeNiP@NCNT/CW                          | balsa wood      | 180@50              | 60.9                          | retain 96% after 200 h          | 9         |
| N/E-HPC-900                            | eucalyptus wood | 440                 | -                             | retain 90% after 5.6 h          | 10        |
| FeNi <sub>3</sub> @NC                  | chitosan        | 277                 | 77                            | retain ~90% after 10 h          | 11        |
| CCC-PAN                                | cotton cloth    | 351                 | 135                           | retain 85% after 15 h           | 12        |
| NPCNS                                  | leaves          | 340@5               | 191                           | retain 83.6% after 20 h         | 13        |
| Co <sub>9</sub> S <sub>8</sub> @Co-N/C | tissue paper    | 373                 | 78.4                          | -                               | 14        |
| Fe <sub>3</sub> O <sub>4</sub> /NiS@CC | Cotton cloth    | 310                 | 82                            | stable after 26 h               | 15        |

**Table S2.** Electrochemical impedance parameters obtained simulating the Nyquist plots in Figure 5f to the equivalent circuit model.

| <b>Catalyst</b>      | <b>R<sub>s</sub></b> | <b>R<sub>ct</sub></b> | <b>CPE-T</b> | <b>CPE-P</b> |
|----------------------|----------------------|-----------------------|--------------|--------------|
| NiFeS14@NCNM/CW      | 2.923                | 1.739                 | 0.2194       | 0.66882      |
| NiFeS8@NCNM/CW       | 3.031                | 1.856                 | 0.21129      | 0.6518       |
| NiFe /CW             | 4.104                | 5.066                 | 0.11518      | 0.69006      |
| RuO <sub>2</sub> /CW | 3.994                | 23.17                 | 0.024906     | 0.66823      |
| NiS@NCNM/CW          | 4.179                | 37.91                 | 0.15231      | 0.68815      |
| S@NCNM/CW            | 4.517                | 505.1                 | 0.019479     | 0.65664      |
| CW                   | 4.878                | 671.7                 | 0.030537     | 0.69094      |



## References

1. W. Gan, L. Wu, Y. Wang, H. Gao, L. Gao, S. Xiao, J. Liu, Y. Xie, T. Li and J. Li, *Adv. Funct. Mater.*, 2021, **31**, 2010951.
2. Y. Li, S. Min and F. Wang, *Sustain. Energ. Fuels*, 2019, **3**, 2753-2762.
3. L. Chen, J. Zhang, B. Lu, H. Liu, R. Wu and Y. Guo, *Int. J. Hydrogen Energy*, 2022, **47**, 35571-35580.
4. Y. Wang, K. Sheng, R. Xu, Z. Chen, K. Shi, W. Li and J. Li, *Chem. Eng. Sci.*, 2023, **268**, 118433.
5. K. Ao, X. Zhang, R. R. Nazmutdinov, D. Wang, J. Shi, X. Yue, J. Sun, W. Schmickler and W. A. Daoud, *Energy Environ. Mater.*, 2023, **0**, e12499.
6. Y. Huang, Y. Qing, Y. Chen, Y. Liao, A. Jiang, Y. Li, Y. Wu, C. Tian and N. Yan, *ACS Sustainable Chem. Eng.*, 2022, **10**, 15233-15242.
7. W. Li, F. Wang, Z. Zhang and S. Min, *Appl. Catal., B*, 2022, **317**, 121758.
8. Y. Wang, Y. Shang, Z. Cao, K. Zeng, Y. Xie, J. Li, Y. Yao and W. Gan, *Chem. Eng. J.*, 2022, **439**, 135722.
9. X. Tao, H. Xu, S. Luo, Y. Wu, C. Tian, X. Lu and Y. Qing, *Appl. Catal., B*, 2020, **279**, 119367.
10. X. Peng, L. Zhang, Z. Chen, L. Zhong, D. Zhao, X. Chi, X. Zhao, L. Li, X. Lu, K. Leng, C. Liu, W. Liu, W. Tang and K. P. Loh, *Adv. Mater.*, 2019, **31**, e1900341.
11. D. Chen, J. Zhu, X. Mu, R. Cheng, W. Li, S. Liu, Z. Pu, C. Lin and S. Mu, *Appl. Catal., B*, 2020, **268**, 118729.
12. C. Zhang, S. Bhoyate, M. Hyatt, B. L. Neria, K. Siam, P. K. Kahol, M. Ghimire, S. R. Mishra, F. Perez and R. K. Gupta, *Surf. Coat. Technol.*, 2018, **347**, 407-413.
13. Y. Huang, D. Wu, D. Cao and D. Cheng, *Int. J. Hydrogen Energy*, 2018, **43**, 8611-8622.
14. I. S. Amiin, Z. Pu, D. He, H. G. R. Monestel and S. Mu, *Carbon*, 2018, **137**, 274-281.
15. S. Jiang, H. Shao, G. Cao, H. Li, W. Xu, J. Li, J. Fang and X. Wang, *J. Mater.*

*Sci. Technol.*, 2020, **59**, 92-99.
